# Supplementary material
Source: publisher figshare collection journal article supplement (https://adisjournals.figshare.com/ndownloader/files/37903770)
Supplement: Supplementary file 1 [file 37903770]

# DUPILUMAB TREATMENT IN ADULTS WITH MODERATE-TO-SEVERE ATOPIC DERMATITIS IS EFFICACIOUS REGARDLESS OF AGE OF DISEASE ONSET: a Post Hoc Analysis of Two Phase 3 Clinical Trials

Jonathan I. Silverberg, Mark Boguniewicz, Jon Hanifin, Kim A. Papp, Haixin Zhang, Ana B. Rossi, Noah A. Levit

DUPILUMAB

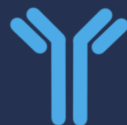

Age of AD onset

The **age of onset for atopic dermatitis (AD)** can vary. However, little is known about possible differences in **treatment efficacy** by age of disease onset.

The SOLO 1 and 2 studies evaluated dupilumab efficacy and safety in adults with moderate-to-severe AD.

We examined efficacy of dupilumab vs placebo in 4 groups of adults with different reported **ages of AD onset**.

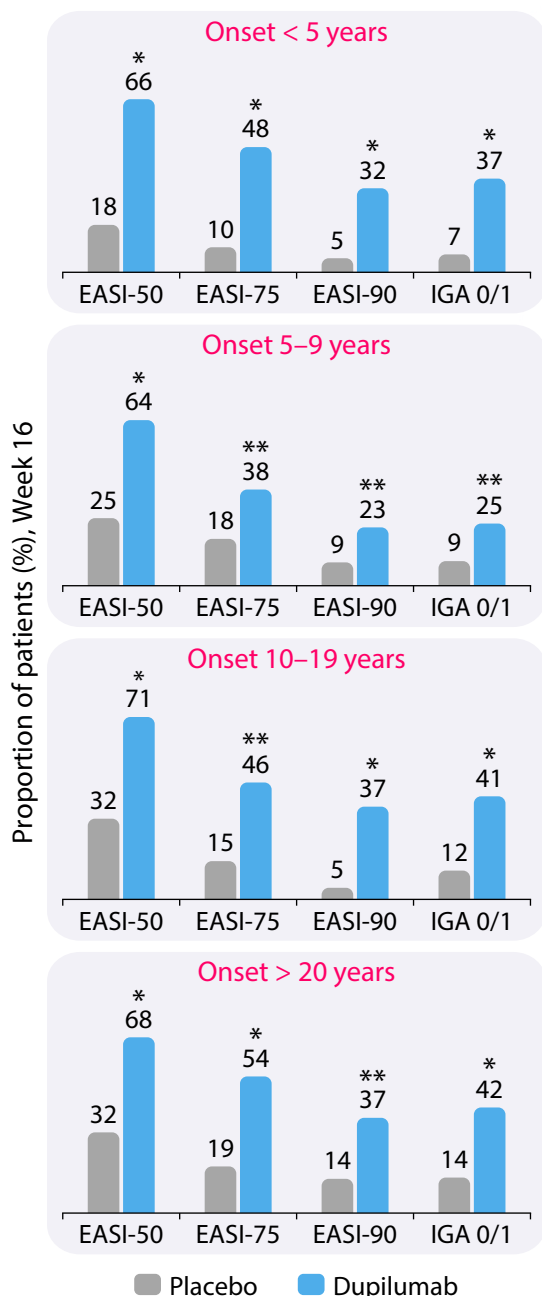

\*p < 0.0001, \*\*p < 0.05, dupilumab vs placebo

## Signs

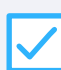

Eczema Area and Severity Index (EASI)

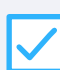

Investigator's Global Assessment (IGA)

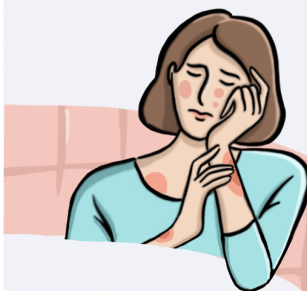

## Symptoms

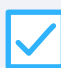

Peak Pruritus Numerical Rating Score (NRS)

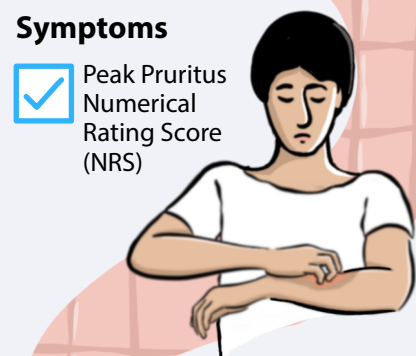

## Quality of Life

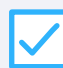

Dermatology Life Quality Index (DLQI)

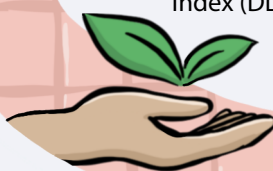

Itch, assessed by Peak Pruritus NRS, and quality of life, assessed by DLQI, also improved with dupilumab treatment in all 4 groups of adults analyzed.

Dupilumab showed similar significant improvement in **signs, symptoms, and QoL** regardless of **age of AD onset**.

PEER-REVIEWED  
INFOGRAPHIC

Adis

OPEN  
ACCESS

The infographic represents the opinions of the authors. For a full list of declarations, including funding and author disclosure statements, and copyright information, please see the full text online.
